# Supplementary material for: Neural Correlates of Palliative Care: A Feasibility Trial in Patients with Metastatic Gastrointestinal and Lung Cancer
Source: Research Square preprint supplement (doi:10.21203/rs.3.rs-9215484/v1), 2026-05-11
Supplement: Supplementary file 1 [file 07a3be171070fd3308e29d70.docx]

**Appendix I.** Patient-Facing Recruitment and Study Information Materials


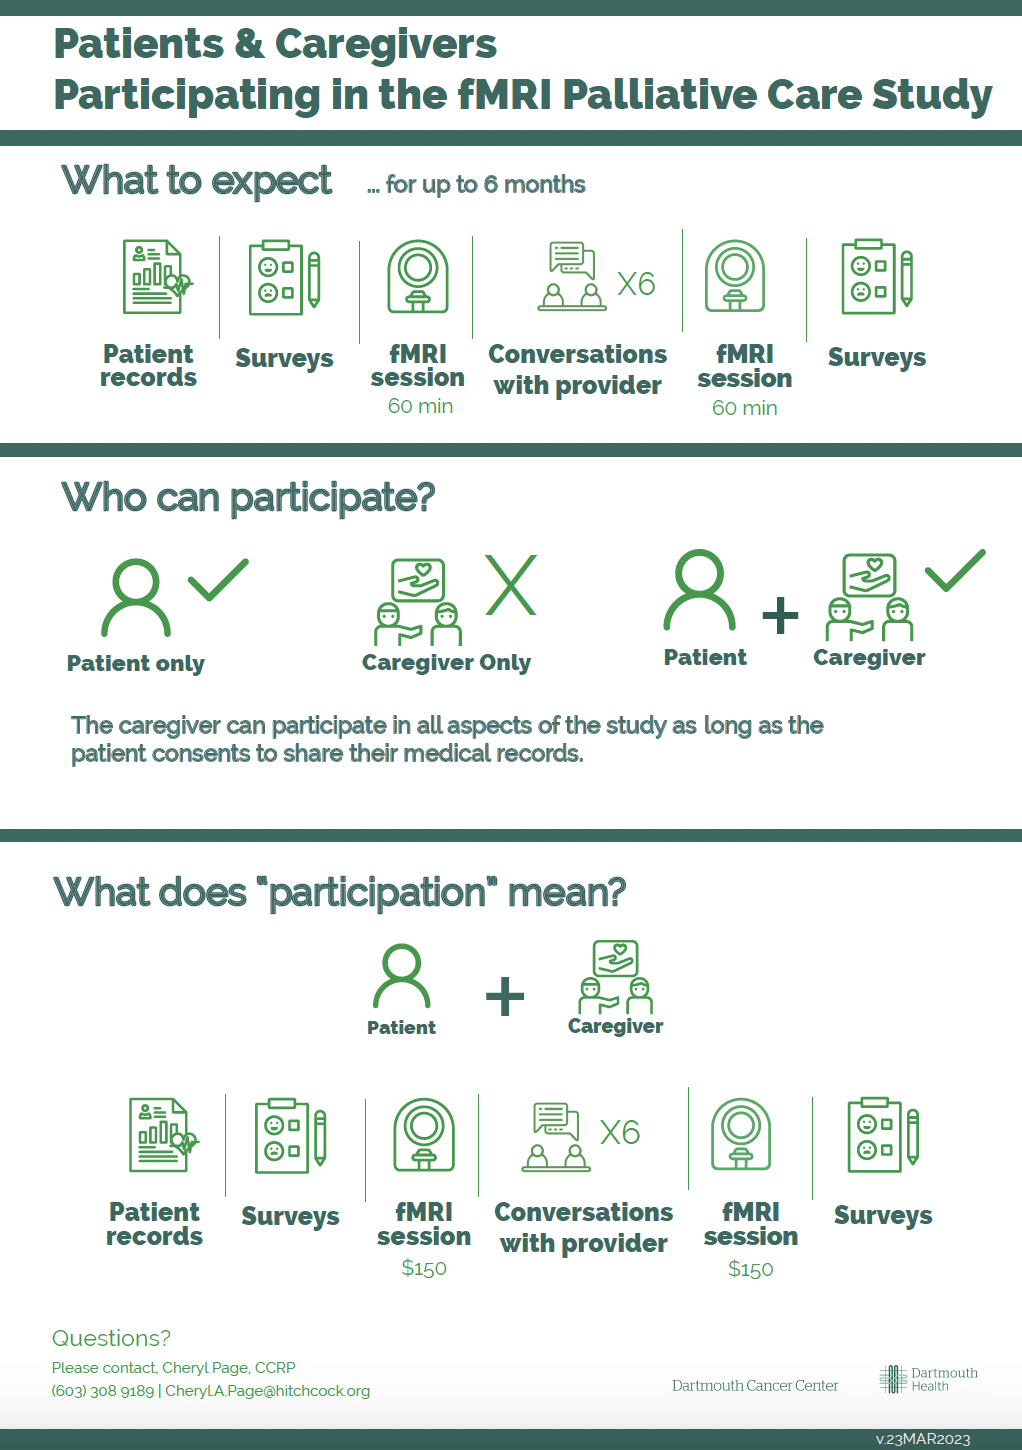


**Appendix II.** Standard Operating Procedure for Researcher-Facing Informed Consent and Post-Participation Debriefing

| OVERALL PROCESS | |
| --- | --- |
| What was the duration of the interaction? | <15 min  >15 min   >30 min |
| Was the research coordinator present when the patient was asked for **permission to approach**? | Yes                No |
| Was **“palliative care”** introduced to the patient prior to the consent process?  By whom? How? | |
| How do you think the patient would describe the stage of their diagnosis?   Only beginning to process   Already processed   Other, please explain below: | |
| Was the patient accompanied by a **caregiver**? | Yes                  No |
| Was the patient or the caregiver **more interested** in the study? | Patient           Caregiver |
| Please note **any specific questions** the patient and/or caregiver asked about the study. | |
| Did you notice any specific things that the patient and/or the caregiver were **receptive or concerned** about? If yes, please explain below. | |

| PATIENT-RESEARCHER INTERACTION | |
| --- | --- |
| How would you describe the patient’s psychosynthesis (mood, attitude, expressions, body language etc.) when **first** introduced? | |
| How would you describe the patient’s psychosynthesis at **the end** of the meeting? | |
| What went well/ what did you **like** about the interaction? | |
| What went bad/what did you **not like** about the interaction? | |
| What would you **change** about the interaction? | |
| Did the **patient** sign the consent form? | Yes           No |
| It is helpful to ask patients whether they would like to contribute by providing the reason(s) of choosing to participate or not in this study.  If the **patient** shared the reasons of participating or not, please explain below. | |
| emotional reasons    burdensome procedure    symptom management   specific to fMRI    location    research interest    already a participant in a research study | other; please explain below |
| Did the **caregiver** sign the consent form? | Yes           No |
| If the **caregiver** shared the reasons of participating or not, please explain below. | |
| emotional reasons   burdensome procedure    symptom management    specific to fMRI   location   research interest   already a participant in a research study | other; please explain below |
| If you chose “location” in one or more of the previous questions, based on what the patient said, would it make a difference if the fMRI scans were being done at Dartmouth Health rather than at Dartmouth College? | Yes, it would make a difference   No, it would not have made a difference |
| Please provide any additional notes below. | |
